# Supplementary material
Source: PubMed Central journal article supplement (PMC8459795)
Supplement: NIHMS1059070-supplement-1.pdf [file NIHMS1059070-supplement-1.pdf]

1 *Parametric Linkage Analysis Identifies Five Novel Genome-wide*  
2 *Significant Loci for Familial Lung Cancer*

3 Anthony M. Musolf<sup>1</sup>, Claire L. Simpson<sup>1,2</sup>, Mariza de Andrade<sup>3</sup>, Diptasri Mandal<sup>4</sup>, Colette Gaba<sup>5</sup>, Ping  
4 Yang<sup>3</sup>, Yafang Li<sup>6</sup>, Ming You<sup>7</sup>, Elena Y. Kupert<sup>7</sup>, Marshall W. Anderson<sup>7</sup>, Ann G. Schwartz<sup>8</sup>, Susan M.  
5 Pinney<sup>9</sup>, Christopher I. Amos<sup>6</sup>, and Joan E. Bailey-Wilson<sup>1\*</sup>

6 <sup>1</sup> National Human Genome Research Institute, National Institutes of Health, Baltimore, MD

7 <sup>2</sup>Department of Genetics, Genomics and Informatics, University of Tennessee Health Science Center,  
8 Memphis, TN

9 <sup>3</sup>Mayo Clinic, Rochester, MN

10 <sup>4</sup>Department of Genetics, Louisiana State University Health Sciences Center, New Orleans, LA

11 <sup>5</sup>Department of Medicine, University of Toledo Dana Cancer Center, Toledo, OH

12 <sup>6</sup>Geisel School of Medicine, Dartmouth College, Lebanon, NH

13 <sup>7</sup>Cancer Center, Medical College of Wisconsin, Milwaukee, WI

14 <sup>8</sup>Karmanos Cancer Institute, Wayne State University, Detroit, MI

15 <sup>9</sup>Department of Environmental Health, University of Cincinnati College of Medicine, Cincinnati, OH

16 \*Correspondence: Joan E. Bailey-Wilson, 333 Cassell Dr, Baltimore, MD 21224, USA, email:  
17 [jebw@mail.nih.gov](mailto:jebw@mail.nih.gov), tel: 1-443-740-2921

18

19 Keywords: Family studies, genetic linkage, genome-wide scan, heterogeneity lod score, linkage analysis,  
20 lod score, lung cancer, parametric (model-based) analysis,

21

22 Short Title: Five Novel Loci Linked to Familial Lung Cancer

23

24

25

26

27

28 **Abstract**

29 **Objective:** One of four American cancer patients dies of lung cancer. Environmental factors such as  
30 tobacco smoking are known to affect lung cancer risk. However, there is a genetic factor to lung cancer  
31 risk as well. Here, we perform parametric linkage analysis on family-based genotype data in an effort to  
32 find genetic loci linked to the disease. **Methods:** 197 individuals from families with a high risk history of  
33 lung cancer were recruited and genotyped using an Illumina array. Parametric linkage analyses were  
34 performed using an affected-only phenotype model with an autosomal dominant inheritance using a  
35 disease allele frequency of 0.01. Three types of analyses were performed: single variant two-point,  
36 collapsed haplotype pattern variant two-point, and multipoint analysis. **Results:** Five novel genome-  
37 wide significant loci were identified at 18p11.23, 2p22.2, 14q13.1, 16p13, and 20q13.11. The families  
38 most informative for linkage were also determined. **Conclusions:** The five novel signals are good  
39 candidate regions, containing genes that have been implicated as having somatic changes in lung cancer  
40 or other cancers (though not in germ line cells). Targeted sequencing on the significant loci is planned  
41 to determine the causal variants at these loci.

42

43 **Introduction**

44 Lung cancer is the most lethal cancer in the United States. While mortality for the disease has  
45 decreased as we have learned more about the relationship between tobacco smoke and lung cancer, an  
46 estimated 158,080 Americans will die of lung cancer in 2016 - approximately 25% of all cancer-related  
47 deaths in the country [1].

48 Environmental exposure to chemical agents found in tobacco smoke [2-5], occupational hazards from  
49 mining, asbestos exposure, shipbuilding, and petroleum refining [6] are known to increase the risk of  
50 lung cancer. Tobacco smoking is by far the most deleterious; it is directly responsible for approximately  
51 85-90% of lung cancer risk [7-9]. The incidence of lung cancer due to smoking is higher in men (90%)  
52 than women (70%) [10].

53 Though it is evident that the vast majority of lung cancer cases are due to the smoking of tobacco  
54 products, this does not account for every case. Approximately 10-15% of nonsmokers develop lung  
55 cancer. While a percentage could be due to secondhand smoking, studies have shown that it is  
56 responsible for only 16-24% of lung cancer in nonsmokers. Further, the number of lung cancer cases in  
57 nonsmokers may actually be increasing, in spite of stricter laws against public tobacco smoking [11].

58 Lung cancer has been found to have a strong genetic component in addition to its well-publicized  
59 environmental components. Familial aggregation of the disease was first identified in 1963 by Tokuhata  
60 and Lilienfeld [12,13], who observed that nonsmoking relatives of smoking lung cancer cases had a  
61 higher risk of susceptibility than nonsmoking relatives of smoking controls. Further studies in Louisiana  
62 [14], Utah [15,16], Texas [17] and Michigan [18] confirmed a higher risk of lung cancer in for individuals  
63 with an affected family member after adjusting for smoking histories.

64 Recently, much work on lung cancer genetics has focused on genome-wide association studies (GWAS).  
65 The majority of GWAS are population-based and focus on the identification of common, low penetrance  
66 variants with a moderate to small effect on disease risk. Several recent GWAS have provided highly  
67 significant and reproducible results for lung cancer. Three studies identified the 15q25 region (which  
68 contains the neuronal acetylcholine receptor gene cluster subunits *CHRNA3*, *CHRNA5*, and *CHRNA4*) was  
69 associated with increased risk [19-21]. Other GWAS in European populations have found significant  
70 associations to 6p21 and 5p15 [19,21-23] while studies in Asian populations have replicated these  
71 findings and found new associations at 3q28 [24-26].

72 Linkage analyses, which use family-based data to find rare, highly penetrant loci, have not been as  
73 prevalent as GWAS in the literature. This is likely due to the expensive and time consuming nature of  
74 collecting family-based samples instead of population-based samples. The first evidence for genome-  
75 wide significant linkage of a lung cancer susceptibility locus was to 6q23-25 [27]. The subjects present in  
76 this study had been collected from across the United States by the Genetic Epidemiology of Lung Cancer  
77 Consortium (GELCC). The GELCC continues to collect samples from high risk lung cancer families. An  
78 update was published 2010 that found further evidence for linkage on 6q and suggestive linkage to  
79 chromosomes 1q, 5q, 8q, 9p, 12q, 14q, and 16q [28]. Here, we present linkage analysis on 25 new  
80 families that have been recruited by the GELCC from 2008-2014.

## 81 **Methods**

### 82 *Patient Recruitment and Family Data Description*

83 Participants with a strong familial history of lung cancer were recruited by the GELCC at eight sites  
84 across the United States. We defined “strong family history of lung cancer” as having three or more  
85 first degree relatives diagnosed with lung cancer. This resulted in the collection of 197 individuals from  
86 25 high risk families. There were 4 two-generation families, 14 three-generation families, 6 four-  
87 generation families, and 1 five-generation family. There was an average of approximately 11.04 people  
88 per pedigree.

89 Blood, saliva, and archival tissue were collected for all participants. For the majority of affected  
90 participants, cancer status was substantiated through medical records, pathology reports, and death  
91 certificates. For the individuals where such documentation did not exist, diagnoses were verified by the  
92 reporting of multiple family members. Further information such as birthdays, age at onset, vital  
93 statistics, and smoking exposure statistics were also collected.

### 94 *Genotyping and Quality Control*

95 Genotyping was performed at the Center for Inherited Disease Research (CIDR) at Johns Hopkins  
96 University using an Illumina HumanCore-12v1-0 array. 192 of 197 samples were successfully genotyped.  
97 298,830 SNPs were genotyped for each individual. Data cleaning was performed by PLINK [29]; 4,186  
98 SNPs and 0 individuals were removed for having a missingness of 1% or greater. 149 ungenotyped  
99 individuals were included in the genotyped pedigrees to create proper familial relationships; these  
100 individuals were used to connect pedigrees that would have otherwise been disjointed. Examples would

101 be a child where just one parent was genotyped, or two siblings with neither parent genotyped (likely  
102 because the parents were deceased). This also allowed for the calculation of identity-by-descent (IBD)  
103 values and to observe any Mendelian inconsistencies in the data. Linkage analysis methods use the  
104 genotype information on genotyped family members to calculate the probabilities of specific  
105 genotypes/haplotypes of the ungenotyped ancestors in the pedigrees.

106 IBD values were calculated by PLINK and PRESTPLUS [30] to confirm correct familial relationships; one  
107 individual was dropped due to an incorrect relationship (the genotypes for this individual were found to  
108 be a duplication of another individual in a different pedigree and thus were most likely due to a  
109 pipetting error. This individual was an unaffected child with no offspring in the third generation of a  
110 pedigree; thus the loss of genotype information from this person resulted in a small power loss in that  
111 family). Sib-pair [31] was used to check all pedigrees for Mendelian errors. SNPs containing Mendelian  
112 errors in a single family were removed from the offending family but kept for analyses in the other  
113 families. SNPs containing Mendelian errors in two or more families were removed from all families.  
114 When there is Mendelian error in only a single family, it is likely due to a single genotype error at that  
115 marker in that family. It is not a systemic problem in genotyping the marker but a random, single event  
116 error that causes the Mendelian inconsistency. If there is a Mendelian error across multiple families,  
117 this is more likely to be a systemic problem in genotyping the marker in any individual. Thus, the  
118 genotyping for all individuals is less reliable and thus the SNP is dropped for all families. At this stage,  
119 the Mendelian inconsistencies were not caused by familial relationships errors, as we had already  
120 checked the IBD values for all individuals and found them to be accurate for the given relationships  
121 except for the one person whose genotypes were dropped due to Mendelian inconsistencies (see  
122 above). When analyzing SNP array genotype data, it is expected that each family will exhibit a small  
123 number of Mendelian inconsistencies due to genotyping errors. True family inconsistencies due to  
124 misspecifications of the relationships OR pipetting errors during sample preparation result in very large  
125 numbers of Mendelian inconsistencies across many SNPs and changes in the overall IBD sharing values  
126 between the relative pairs in question. There were 887 total Mendelian inconsistencies, but only 133  
127 that appeared in multiple families. 48,192 markers that were monomorphic throughout the entire  
128 population were also removed. After data cleaning, 246,319 SNPs remained for analysis.

129 Allele frequencies for the entire data set were then calculated by Sib-pair. Seventeen married-in  
130 spouses with genotype information but no offspring were used in the allele frequency calculations but  
131 dropped from the linkage analyses. Genetic positions for all SNPs were obtained from the Rutgers Map  
132 version 3 [32] using physical positions from GRCh37. Full diagnostics of the samples analyzed, including  
133 average age and percent smokers, can be found in Table 1.

#### 134 *Parametric Linkage Analyses*

135 All linkages analyses were affected-only analyses; affected individuals were coded as affected;  
136 unaffected or unknown individuals were coded as having missing phenotypes. This allowed for the high  
137 degree of uncertainty between smoking and lung cancer risk as well as jointly allowing for smoking  
138 status (80% of affected individuals in the pedigrees smoked). The genetic model assumed a disease  
139 allele frequency (DAF) of 1% under an autosomal dominant model.

140 Historically we have used a low penetrance model of 10% for carriers and a 1% phenocopy rate in  
141 linkage analyses of other families because segregation analyses suggest that the lung cancer variant is  
142 most likely not highly penetrant in the absence of personal smoking. Given that the linkage analysis  
143 methods used do not allow the inclusion of smoking as a covariate in any simple manner, this low  
144 penetrance model was used previously to attempt to deal with lack of smoking exposure among many  
145 at risk relatives. However, because the families being analyzed in this study consisted of a vast majority  
146 of smokers and we coded all unaffected individuals as unknown phenotype, a higher penetrance model  
147 made more sense. Thus we performed analyses using our low penetrance model (as done in prior  
148 studies) and two higher penetrance models that we believe are more appropriate for this particular data  
149 set. As expected, the higher penetrance models produced stronger evidence in favor of linkage in five  
150 regions compared to the low penetrance model. However, we found no change in the significant signals  
151 between the 40% and 80% penetrance models and the difference between the LOD scores was not  
152 statistically significant (though the LOD scores for 80% were slightly higher in magnitude). Given the  
153 uncertainty of the correct model to use, we decided to present the results of the more conservative  
154 intermediate penetrance model.

155 Performing an affecteds-only analysis with these penetrance models has the effect that non-smoking  
156 unaffected individuals do not contribute information about “not-sharing” genotypes with “affected”  
157 individuals in the linkage calculations, thus mitigating the fact that we do not have good age/smoking  
158 penetrance distributions to use in our analyses. Furthermore, since most affecteds are smokers and the  
159 few non-smokers who are affected are considered to be at very high genetic risk, the moderate  
160 phenocopy rate used in the penetrance models allows for the fact that some heavy-smoking affected  
161 individuals in these families might not be carrying the same risk variant carried by the other affected  
162 members of their family.

163 Three distinct types of parametric linkage analyses were performed. The first was the standard single  
164 variant two-point linkage analysis that observes linkage between a single SNP and the disease trait using  
165 an Elston-Stewart algorithm implemented by TwoPointLods [33]. Multipoint linkage analysis was  
166 performed by SimWalk2 [34-36]. SNPs were pruned prior to the multipoint linkage analyses in order to  
167 remove intermarker linkage disequilibrium that could lead to increased type I error rates. Markers were  
168 grouped into 1 cM bins and the SNP with the highest minor allele frequency (thus the highest  
169 information content), was chosen to represent the bin. This resulted in approximately 3,000 SNPs for  
170 the multipoint analysis. Once linkage analysis was complete, all variants were annotated by ANNOVAR  
171 [37,38].

172 To compensate for some of this loss of information in the multipoint analysis, we used the collapsed  
173 haplotype pattern method (CHP) implemented through SEQLinkage [39]. CHP combines SNPs into  
174 multiallelic pseudo-markers. These pseudo-markers correspond to annotated genes in RefSeq. The  
175 pruning for intermarker LD that is necessary to run programs like SimWalk2 is not needed under this  
176 scenario, so more information is retained. This approach has shown to be powerful and maintain proper  
177 type I error rates when SNPs with rare minor alleles in the analysis. We restricted CHP analysis to  
178 markers with a minor allele frequency of 10% and under (approximately 35,000 SNPs). The regional  
179 markers are sometimes further divided into smaller subunits based on observed recombination events

180 within a gene. After the regional pseudo-markers were created, standard two-point linkage analysis was  
181 performed on the new markers using MERLIN [40]. This method will henceforth be referred to as CHP  
182 two-point linkage.

### 183 **Results**

184 CHP two-point linkage analysis identified five significant linkage signals located on five chromosomes  
185 (Figure 1, Table 2). Here, we use the Lander and Kruglyak values of  $HLOD \geq 3.3$  and  $HLOD \geq 1.9$  as the  
186 respective thresholds for genome-wide significance and suggestion [41]. A LOD score of 3.3 corresponds  
187 to a p-value of  $4.9 \times 10^{-5}$  and a LOD score of 1.9 corresponds to  $1.7 \times 10^{-3}$ . The highest HLOD was 4.11  
188 located on 18p11.23 and centered on the *PTPRM* gene. The other significant signals were located at  
189 *LRP1B* (HLOD = 3.90) at 2p22.2, *NPAS3* (HLOD = 3.73) at 14q13.1, *RBFOX1* (HLOD = 3.36) at 16p13, and  
190 *PTPRT* (HLOD = 3.34) at 20q13.11. A further 74 suggestive signals were found throughout the genome  
191 (Supplemental Table 1).

192 Multipoint analysis yielded no significant linkage signals and three suggestive linkage signals (Figure 2,  
193 Table 3). All three suggestive signals were located on 17q21.33. Further the top 9 SNPs were all located  
194 in the 17q21.32 – q22 region (Figure 3). The highest HLOD (1.97) was located in an intron of *CA10*; the two  
195 other suggestive HLOD scores (1.96 and 1.92) were located in an intron of *UTP18* and the intergenic  
196 region of *CA10* and *C17orf112*. The highest exonic SNP (HLOD = 1.87) was also located in 17q21.33, in  
197 the *AMAP1* gene. The 17q21.32-q22 signal was primarily driven by three families – family 138 (HLOD  
198 range 0.44 – 0.80), family 147 (HLOD range 0.51 – 0.55), and family 148 (HLOD range 0.34 – 0.45).

199 Two-point analysis did not reveal any significant or suggestive markers (Supplemental Figure 2). The  
200 highest overall HLOD (1.80) was located on 17p12 in an intergenic region between *ELAC2* and *HS3T3A1*.

201 Since these families had not been previously analyzed, this set of linkage analyses allowed us to  
202 determine which families were informative for linkage at all. Five families were not informative for  
203 linkage at all (meaning they had no nonzero LOD scores for any of the three types of analyses)  
204 (Supplemental Table 2). The other twenty families showed varying degrees of information. From these  
205 twenty, there were eight families that had LOD scores above or approximately equal to 0.5 for all three  
206 types of analyses. We considered these families highly informative for linkage and will be the most  
207 useful for future sequencing studies.

### 208 **Discussion**

209 CHP two-point analysis located five novel significant linkage signals for familial lung cancer in this  
210 genotype data. While these signals had not previously been identified for linkage, all of these signals  
211 had been previously implicated in somatic changes in lung cancer in cell lines or in vivo. The protein  
212 tyrosine phosphatase gene *PTPRM*, located on 18p11.23, was the highest linkage peak. Protein tyrosine  
213 phosphatases regulate cellular growth and the mitotic cycle and are known oncogenes. *PTPRM* in  
214 particular has been implicated as an oncogene for lung cancer [42]. It has also been found to affect  
215 methylation patterns in lung cancer tumor cells compared to non-tumor cells [43] and has been shown  
216 to be activated in *KRAS* mutant lung adenocarcinomas [44].

217 Another member of the protein tyrosine phosphatase family, *PTPRT* was also found to be significant for  
218 linkage. *PTPRT*, located on 20q13, has been shown to be mutated in lung cancer cells and may be  
219 involved in cellular adhesion and tumor migration [45]. Whole exome sequencing of matched pairs of  
220 lung carcinomas and normal tissue found an increase of somatic mutation of this gene [46] and  
221 mutational analysis of *PTPRT* suggested a potential role as a tumor suppressor in colorectal cancer [47].

222 The low density lipoprotein receptor *LRP1B*, located at 2p22.2, had the second highest HLOD score and  
223 is well documented as being deleted in tumor cells. It is a likely tumor suppressor gene in multiple  
224 cancers, including lung cancer [48]. The gene is inactivated in nearly 50% of non-small cell lung cancer  
225 cell lines [49]; its normal function when active includes inhibiting cellular migration [50]. All previous  
226 reports of *LRP1B* inactivation are somatic mutations or deletions; this is the first report of an *LRP1B*  
227 mutation in the germ line affecting familial lung cancer risk.

228 The significant signal at 16p13.3 centered on the RNA binding protein *RBFOX1* (HLOD = 3.48). This gene  
229 has been found to be deleted in malignant mesothelioma cell lines [51]. Furthermore, *RBFOX1* has been  
230 linked to disease recurrence in colon cancer in array-CGH [52] and significantly associated with  
231 increased survival of chemotherapy treated breast cancer patients in a Finnish GWAS study [53]. Our  
232 study is the first to report a familial linkage to the region.

233 The transcription factor *NPAS3* at 14q13.1 has not previously been found to have any links to lung  
234 cancer. It has been shown to be critical for lung development [54]. In addition, knockdown of *NPAS3*  
235 has been shown to induce the growth of malignant astrocytomas in cell lines and overexpressed *NPAS3*  
236 suppressed transformation in malignant glioma cell lines, leading to speculation that *NPAS3* functions as  
237 a tumor suppressor [55].

238 While the multipoint analysis found no significant signals, one suggestive region was found at 17q22.33.  
239 This region contains *AMAP1*, which is overexpressed in breast cancer tumors [56] and has been found to  
240 play a role in both metastasis [57] and the epithelial-mesenchymal transition [58]. The membrane  
241 trafficking protein *TOM1L1* is also located near this region and had been implicated in both breast  
242 cancer [59] and colorectal cancer [60].

243 The single variant two-point analyses found no significant or suggestive variants. This is likely due to the  
244 lack of information within these pedigrees for single variant two-point analysis. We had no more than  
245 two genotyped affected individuals per family. Therefore, the linkage analysis algorithms use the  
246 information from the genotyped affected and unaffected individuals to calculate the probability of a  
247 given genotype for additional ancestors in the family (particularly affected family members). This is a  
248 standard property of linkage analysis in general. However, imputation of genotypes for the  
249 ungenotyped affected individuals is less informative at single SNP than when multiple SNPs are  
250 combined into haplotypes. The calculation of genotype probabilities for ungenotyped affecteds is less  
251 accurate when using single SNP loci as opposed to multiple SNPs combined into more informative  
252 multiallelic haplotypes, as was done in the CHP analysis. This resulted in the higher information content  
253 and thus higher power in the CHP two-point analyses.

254 Another interesting observation is the amount of overlap between the three linkage methods. There  
255 was some overlap between the CHP two-point results and the multipoint results, as both analyses  
256 localized a signal to the 18q21-23 region, though the magnitude of the signal was much higher in the  
257 CHP two-point analysis. The lower magnitude was most likely due to the heavy pruning of the data  
258 required to perform the multipoint analysis. Further, large degrees of overlap are unlikely between the  
259 CHP two-point and multipoint analyses because the data sets necessitate different types of filtering;  
260 multipoint analysis required the binning of SNPs and selection based on the highest MAF, while the CHP  
261 two-point analysis required SNPs with a MAF  $\leq 0.1$ . CHP two-point analysis also used multiallelic  
262 pseudo-markers instead of the bilallelic markers used in the multipoint and single variant two-point  
263 analyses, resulting in greater information content and consequently higher power for the CHP two-point  
264 analysis.

265 The linkage analyses also allowed us to determine which families were informative for linkage; again  
266 critical because no family had more than two genotyped affecteds. Twenty of the twenty-five families  
267 were informative for at least one of the linkage analyses. Eight were highly informative. The  
268 information content of these families gives them priority for future sequencing studies. We will likely  
269 perform targeted sequencing on the five loci of interest identified from this study; the sequencing will  
270 focus on these eight families. Similarly, the GELCC is performing whole exome sequencing (WES) on  
271 families from throughout its entire data set (not just the new families used here). The information  
272 gained from the LOD score metrics from these analyses identified that the top four families (i.e. the 4  
273 most informative of the eight highly informative families identified in this data set) will be included in  
274 this WES effort.

275 We note that we did not see any replication of the previously published linkage signal identified on 6q in  
276 these families. Lung cancer (like all cancers) is a highly heterogeneous phenotype and it is not unlikely  
277 that the majority of the families here might have different causal loci. In fact, in Bailey-Wilson et al. [27]  
278 of the 6q linkage, only a small proportion of the families were strongly linked to this region.

279 One interesting additional note regarding this data set. We have data for age, age at onset, and smoking  
280 status for these families. However, there is currently no reliable way to add covariates to most linkage  
281 analysis programs, particularly for multipoint linkage analysis. Development of linkage analysis software  
282 stagnated after the explosion of GWAS studies in the early 2000s. Our approach in this study was to  
283 control for smoking status by performing affected-only linkage analysis, using the genotypes from  
284 unaffected individuals solely to impute genotypes of ungenotyped affecteds and to help compute the  
285 probability of identity by descent sharing of alleles by the affected relative pairs using linkage analysis  
286 algorithms. This approach was helped by the fact that approximately 80% of the affected individuals  
287 were known to smoke. As family-based studies have begun to come back into vogue in recent years,  
288 this will hopefully result in the development of additional linkage software that can include covariates.

289 Despite advances in treatment and prevention, lung cancer still remains the leading cancer killer in the  
290 United States. Our linkage analyses identified genome-wide specific signals on 18p11.23, 2p22.2,  
291 14q13.1, 16p13, and 20q13.11. While several of the signals centered on genes with a previous  
292 implication to lung cancer (though not in the germ line), we want to further elucidate the causal



293 variant(s) underlying each signal, so targeted sequencing of these regions is planned. The denser map  
294 will allow us a greater ability to pinpoint the exact variant(s) that is causing each signal. Once a  
295 preliminary causal variant has been identified, laboratory based work will be performed to confirm the  
296 finding.

297 **Acknowledgments:** This work was funded by the U.S. National Institutes of Health grants U01CA76293,  
298 U19CA148127, P30CA22453, HHSN26820100007C, and P30ES006096 and by the Intramural Research  
299 Program of the National Human Genome Research Institute. The authors gratefully acknowledge the  
300 study participants and their families.

301 **Author Contributions:** AMM and CLS performed statistical analyses of the data. MA, DM, CG, PY, YL,  
302 MY, MWA, AGS, SMP, CIA, JEBW designed the study, obtained funding, obtained the genotype data, and  
303 were involved in enrollment of study participants. EYK performed laboratory work on the study. AMM  
304 wrote the manuscript. All other authors reviewed and edited the manuscript.

305 **Conflicts of Interest:** The authors declare no conflicts of interest.

306

## 307 **References**

- 308 1 Society AC: Cancer facts & figures 2016: Atlanta: American Cancer Society, 2016,  
309 2 Doll R, Peto R: The causes of cancer: Quantitative estimates of avoidable risks of cancer in the  
310 united states today. *Journal of the National Cancer Institute* 1981;66:1191-1308.
- 311 3 Doll R, Peto R, Wheatley K, Gray R, Sutherland I: Mortality in relation to smoking: 40 years'  
312 observations on male british doctors. *Bmj* 1994;309:901-911.
- 313 4 Carbone D: Smoking and cancer. *The American journal of medicine* 1992;93:13S-17S.
- 314 5 Burch PR: Smoking and lung cancer. Tests of a causal hypothesis. *Journal of chronic diseases*  
315 1980;33:221-238.
- 316 6 Morgan WK, Seaton A: Occupational lung diseases. Philadelphia, W.B. Saunders, 1984.
- 317 7 Peto R, Darby S, Deo H, Silcocks P, Whitley E, Doll R: Smoking, smoking cessation, and lung  
318 cancer in the uk since 1950: Combination of national statistics with two case-control studies. *Bmj*  
319 2000;321:323-329.
- 320 8 Flanders WD, Lally CA, Zhu BP, Henley SJ, Thun MJ: Lung cancer mortality in relation to age,  
321 duration of smoking, and daily cigarette consumption: Results from cancer prevention study ii. *Cancer*  
322 *research* 2003;63:6556-6562.
- 323 9 Mattson ME, Pollack ES, Cullen JW: What are the odds that smoking will kill you? *American*  
324 *journal of public health* 1987;77:425-431.
- 325 10 Shopland DR, Eyre HJ, Pechacek TF: Smoking-attributable cancer mortality in 1991: Is lung  
326 cancer now the leading cause of death among smokers in the united states? *Journal of the National*  
327 *Cancer Institute* 1991;83:1142-1148.
- 328 11 Jenks S: Is lung cancer incidence increasing in never-smokers? *Journal of the National Cancer*  
329 *Institute* 2016;108
- 330 12 Tokuhata GK, Lilienfeld AM: Familial aggregation of lung cancer in humans. *Journal of the*  
331 *National Cancer Institute* 1963;30:289-312.
- 332 13 Tokuhata GK, Lilienfeld AM: Familial aggregation of lung cancer among hospital patients. *Public*  
333 *health reports* 1963;78:277-283.

334 14 Ooi WL, Elston RC, Chen VW, Bailey-Wilson JE, Rothschild H: Increased familial risk for lung  
335 cancer. *Journal of the National Cancer Institute* 1986;76:217-222.

336 15 Cannon-Albright LA, Thomas A, Goldgar DE, Gholami K, Rowe K, Jacobsen M, McWhorter WP,  
337 Skolnick MH: Familiality of cancer in utah. *Cancer research* 1994;54:2378-2385.

338 16 Goldgar DE, Easton DF, Cannon-Albright LA, Skolnick MH: Systematic population-based  
339 assessment of cancer risk in first-degree relatives of cancer probands. *Journal of the National Cancer*  
340 *Institute* 1994;86:1600-1608.

341 17 Etzel CJ, Amos CI, Spitz MR: Risk for smoking-related cancer among relatives of lung cancer  
342 patients. *Cancer research* 2003;63:8531-8535.

343 18 Cote ML, Kardia SL, Wenzlaff AS, Ruckdeschel JC, Schwartz AG: Risk of lung cancer among white  
344 and black relatives of individuals with early-onset lung cancer. *Jama* 2005;293:3036-3042.

345 19 Hung RJ, McKay JD, Gaborieau V, Boffetta P, Hashibe M, Zaridze D, Mukeria A, Szeszenia-  
346 Dabrowska N, Lissowska J, Rudnai P, Fabianova E, Mates D, Bencko V, Foretova L, Janout V, Chen C,  
347 Goodman G, Field JK, Liloglou T, Xinarianos G, Cassidy A, McLaughlin J, Liu G, Narod S, Krokan HE,  
348 Skorpen F, Elvestad MB, Hveem K, Vatten L, Linseisen J, Clavel-Chapelon F, Vineis P, Bueno-de-Mesquita  
349 HB, Lund E, Martinez C, Bingham S, Rasmuson T, Hainaut P, Riboli E, Ahrens W, Benhamou S, Lagiou P,  
350 Trichopoulos D, Holcatova I, Merletti F, Kjaerheim K, Agudo A, Macfarlane G, Talamini R, Simonato L,  
351 Lowry R, Conway DI, Znaor A, Healy C, Zelenika D, Boland A, Delepine M, Foglio M, Lechner D, Matsuda  
352 F, Blanche H, Gut I, Heath S, Lathrop M, Brennan P: A susceptibility locus for lung cancer maps to  
353 nicotinic acetylcholine receptor subunit genes on 15q25. *Nature* 2008;452:633-637.

354 20 Thorgeirsson TE, Geller F, Sulem P, Rafnar T, Wiste A, Magnusson KP, Manolescu A, Thorleifsson  
355 G, Stefansson H, Ingason A, Stacey SN, Bergthorsson JT, Thorlacius S, Gudmundsson J, Jonsson T,  
356 Jakobsdottir M, Saemundsdottir J, Olafsdottir O, Gudmundsson LJ, Bjornsdottir G, Kristjansson K,  
357 Skuladottir H, Isaksson HJ, Gudbjartsson T, Jones GT, Mueller T, Gottsater A, Flex A, Aben KK, de Vegt F,  
358 Mulders PF, Isla D, Vidal MJ, Asin L, Saez B, Murillo L, Blondal T, Kolbeinsson H, Stefansson JG, Hansdottir  
359 I, Runarsdottir V, Pola R, Lindblad B, van Rij AM, Dieplinger B, Haltmayer M, Mayordomo JI, Kiemeny  
360 LA, Matthiasson SE, Oskarsson H, Tyrfingsson T, Gudbjartsson DF, Gulcher JR, Jonsson S, Thorsteinsdottir  
361 U, Kong A, Stefansson K: A variant associated with nicotine dependence, lung cancer and peripheral  
362 arterial disease. *Nature* 2008;452:638-642.

363 21 Amos CI, Wu X, Broderick P, Gorlov IP, Gu J, Eisen T, Dong Q, Zhang Q, Gu X, Vijayakrishnan J,  
364 Sullivan K, Matakidou A, Wang Y, Mills G, Doheny K, Tsai YY, Chen WV, Shete S, Spitz MR, Houlston RS:  
365 Genome-wide association scan of tag snps identifies a susceptibility locus for lung cancer at 15q25.1.  
366 *Nature genetics* 2008;40:616-622.

367 22 Broderick P, Wang Y, Vijayakrishnan J, Matakidou A, Spitz MR, Eisen T, Amos CI, Houlston RS:  
368 Deciphering the impact of common genetic variation on lung cancer risk: A genome-wide association  
369 study. *Cancer research* 2009;69:6633-6641.

370 23 Wang Y, Broderick P, Webb E, Wu X, Vijayakrishnan J, Matakidou A, Qureshi M, Dong Q, Gu X,  
371 Chen WV, Spitz MR, Eisen T, Amos CI, Houlston RS: Common 5p15.33 and 6p21.33 variants influence  
372 lung cancer risk. *Nature genetics* 2008;40:1407-1409.

373 24 Hu Z, Wu C, Shi Y, Guo H, Zhao X, Yin Z, Yang L, Dai J, Hu L, Tan W, Li Z, Deng Q, Wang J, Wu W,  
374 Jin G, Jiang Y, Yu D, Zhou G, Chen H, Guan P, Chen Y, Shu Y, Xu L, Liu X, Liu L, Xu P, Han B, Bai C, Zhao Y,  
375 Zhang H, Yan Y, Ma H, Chen J, Chu M, Lu F, Zhang Z, Chen F, Wang X, Jin L, Lu J, Zhou B, Lu D, Wu T, Lin D,  
376 Shen H: A genome-wide association study identifies two new lung cancer susceptibility loci at 13q12.12  
377 and 22q12.2 in han chinese. *Nature genetics* 2011;43:792-796.

378 25 Dong J, Hu Z, Wu C, Guo H, Zhou B, Lv J, Lu D, Chen K, Shi Y, Chu M, Wang C, Zhang R, Dai J, Jiang  
379 Y, Cao S, Qin Z, Yu D, Ma H, Jin G, Gong J, Sun C, Zhao X, Yin Z, Yang L, Li Z, Deng Q, Wang J, Wu W, Zheng  
380 H, Zhou G, Chen H, Guan P, Peng Z, Chen Y, Shu Y, Xu L, Liu X, Liu L, Xu P, Han B, Bai C, Zhao Y, Zhang H,  
381 Yan Y, Amos CI, Chen F, Tan W, Jin L, Wu T, Lin D, Shen H: Association analyses identify multiple new

382 lung cancer susceptibility loci and their interactions with smoking in the chinese population. *Nature*  
383 *genetics* 2012;44:895-899.

384 26 Shiraishi K, Kunitoh H, Daigo Y, Takahashi A, Goto K, Sakamoto H, Ohnami S, Shimada Y,  
385 Ashikawa K, Saito A, Watanabe S, Tsuta K, Kamatani N, Yoshida T, Nakamura Y, Yokota J, Kubo M, Kohno  
386 T: A genome-wide association study identifies two new susceptibility loci for lung adenocarcinoma in the  
387 japanese population. *Nature genetics* 2012;44:900-903.

388 27 Bailey-Wilson JE, Amos CI, Pinney SM, Petersen GM, de Andrade M, Wiest JS, Fain P, Schwartz  
389 AG, You M, Franklin W, Klein C, Gazdar A, Rothschild H, Mandal D, Coons T, Slusser J, Lee J, Gaba C,  
390 Kupert E, Perez A, Zhou X, Zeng D, Liu Q, Zhang Q, Seminara D, Minna J, Anderson MW: A major lung  
391 cancer susceptibility locus maps to chromosome 6q23-25. *American journal of human genetics*  
392 2004;75:460-474.

393 28 Amos CI, Pinney SM, Li Y, Kupert E, Lee J, de Andrade MA, Yang P, Schwartz AG, Fain PR, Gazdar  
394 A, Minna J, Wiest JS, Zeng D, Rothschild H, Mandal D, You M, Coons T, Gaba C, Bailey-Wilson JE,  
395 Anderson MW: A susceptibility locus on chromosome 6q greatly increases lung cancer risk among light  
396 and never smokers. *Cancer research* 2010;70:2359-2367.

397 29 Purcell S, Neale B, Todd-Brown K, Thomas L, Ferreira MA, Bender D, Maller J, Sklar P, de Bakker  
398 PI, Daly MJ, Sham PC: Plink: A tool set for whole-genome association and population-based linkage  
399 analyses. *American journal of human genetics* 2007;81:559-575.

400 30 McPeck MS, Sun L: Statistical tests for detection of misspecified relationships by use of genome-  
401 screen data. *American journal of human genetics* 2000;66:1076-1094.

402 31 Duffy D: Sib-pair: A program for simple genetic analysis v1.00.Beta, Queensland Institute of  
403 Medical Research, 2008,

404 32 Matisse TC, Chen F, Chen W, De La Vega FM, Hansen M, He C, Hyland FC, Kennedy GC, Kong X,  
405 Murray SS, Ziegler JS, Stewart WC, Buyske S: A second-generation combined linkage physical map of the  
406 human genome. *Genome research* 2007;17:1783-1786.

407 33 Thomas A: Twopointslods: TwoPointLods, [http://www-genepi.med.utah.edu/~alun/software/](http://www.genepi.med.utah.edu/~alun/software/),

408 34 Sobel E, Lange K: Descent graphs in pedigree analysis: Applications to haplotyping, location  
409 scores, and marker-sharing statistics. *American journal of human genetics* 1996;58:1323-1337.

410 35 Sobel E, Papp JC, Lange K: Detection and integration of genotyping errors in statistical genetics.  
411 *American journal of human genetics* 2002;70:496-508.

412 36 Sobel E, Sengul H, Weeks DE: Multipoint estimation of identity-by-descent probabilities at  
413 arbitrary positions among marker loci on general pedigrees. *Human heredity* 2001;52:121-131.

414 37 Wang K, Li M, Hakonarson H: Annovar: Functional annotation of genetic variants from high-  
415 throughput sequencing data. *Nucleic acids research* 2010;38:e164.

416 38 Chang X, Wang K: Wannovar: Annotating genetic variants for personal genomes via the web.  
417 *Journal of medical genetics* 2012;49:433-436.

418 39 Wang GT, Zhang D, Li B, Dai H, Leal SM: Collapsed haplotype pattern method for linkage analysis  
419 of next-generation sequence data. *European journal of human genetics : EJHG* 2015;23:1739-1743.

420 40 Abecasis GR, Cherny SS, Cookson WO, Cardon LR: Merlin--rapid analysis of dense genetic maps  
421 using sparse gene flow trees. *Nature genetics* 2002;30:97-101.

422 41 Lander E, Kruglyak L: Genetic dissection of complex traits: Guidelines for interpreting and  
423 reporting linkage results. *Nature genetics* 1995;11:241-247.

424 42 Wang Y, Mei Q, Ai YQ, Li RQ, Chang L, Li YF, Xia YX, Li WH, Chen Y: Identification of lung cancer  
425 oncogenes based on the mrna expression and single nucleotide polymorphism profile data. *Neoplasma*  
426 2015;62:966-973.

427 43 Mullapudi N, Ye B, Suzuki M, Fazzari M, Han W, Shi MK, Marquardt G, Lin J, Wang T, Keller S, Zhu  
428 C, Locker JD, Spivack SD: Genome wide methylome alterations in lung cancer. *PloS one*  
429 2015;10:e0143826.

430 44 Li J, Sordella R, Powers S: Effectors and potential targets selectively upregulated in human kras-  
431 mutant lung adenocarcinomas. *Scientific reports* 2016;6:27891.

432 45 Yu J, Becka S, Zhang P, Zhang X, Brady-Kalnay SM, Wang Z: Tumor-derived extracellular  
433 mutations of ptp<sup>prt</sup>/ptp<sup>rho</sup> are defective in cell adhesion. *Molecular cancer research : MCR* 2008;6:1106-  
434 1113.

435 46 Choi M, Kadara H, Zhang J, Cuentas EP, Canales JR, Gaffney SG, Zhao Z, Behrens C, Fujimoto J,  
436 Chow C, Kim K, Kalhor N, Moran C, Rimm D, Swisher S, Gibbons DL, Heymach J, Kaftan E, Townsend JP,  
437 Lynch TJ, Schlessinger J, Lee JJ, Lifton RP, Herbst RS, Wistuba, II: Mutation profiles in early-stage lung  
438 squamous cell carcinoma with clinical follow-up and correlation with markers of immune function.  
439 *Annals of oncology : official journal of the European Society for Medical Oncology* 2016

440 47 Wang Z, Shen D, Parsons DW, Bardelli A, Sager J, Szabo S, Ptak J, Silliman N, Peters BA, van der  
441 Heijden MS, Parmigiani G, Yan H, Wang TL, Riggins G, Powell SM, Willson JK, Markowitz S, Kinzler KW,  
442 Vogelstein B, Velculescu VE: Mutational analysis of the tyrosine phosphatome in colorectal cancers.  
443 *Science* 2004;304:1164-1166.

444 48 Beer AG, Zenzmaier C, Schreinlechner M, Haas J, Dietrich MF, Herz J, Marschang P: Expression of  
445 a recombinant full-length lrp1b receptor in human non-small cell lung cancer cells confirms the  
446 postulated growth-suppressing function of this large ldl receptor family member. *Oncotarget* 2016

447 49 Liu CX, Musco S, Lisitsina NM, Yaklichkin SY, Lisitsyn NA: Genomic organization of a new  
448 candidate tumor suppressor gene, lrp1b. *Genomics* 2000;69:271-274.

449 50 Li Y, Knisely JM, Lu W, McCormick LM, Wang J, Henkin J, Schwartz AL, Bu G: Low density  
450 lipoprotein (ldl) receptor-related protein 1b impairs urokinase receptor regeneration on the cell surface  
451 and inhibits cell migration. *The Journal of biological chemistry* 2002;277:42366-42371.

452 51 Klorin G, Rozenblum E, Glebov O, Walker RL, Park Y, Meltzer PS, Kirsch IR, Kaye FJ, Roschke AV:  
453 Integrated high-resolution array cgh and sky analysis of homozygous deletions and other genomic  
454 alterations present in malignant mesothelioma cell lines. *Cancer genetics* 2013;206:191-205.

455 52 Mampaey E, Fieuw A, Van Laethem T, Ferdinande L, Claes K, Ceelen W, Van Nieuwenhove Y,  
456 Pattyn P, De Man M, De Ruyck K, Van Roy N, Geboes K, Laurent S: Focus on 16p13.3 locus in colon  
457 cancer. *PloS one* 2015;10:e0131421.

458 53 Fagerholm R, Schmidt MK, Khan S, Rafiq S, Tapper W, Aittomaki K, Greco D, Heikkinen T,  
459 Muranen TA, Fasching PA, Janni W, Weinshilboum R, Loehberg CR, Hopper JL, Southey MC, Keeman R,  
460 Lindblom A, Margolin S, Mannermaa A, Kataja V, Chenevix-Trench G, kConFab I, Lambrechts D, Wildiers  
461 H, Chang-Claude J, Seibold P, Couch FJ, Olson JE, Andrulis IL, Knight JA, Garcia-Closas M, Figueroa J,  
462 Hooning MJ, Jager A, Shah M, Perkins BJ, Luben R, Hamann U, Kabisch M, Czene K, Hall P, Easton DF,  
463 Pharoah PD, Liu J, Eccles D, Blomqvist C, Nevanlinna H: The snp rs6500843 in 16p13.3 is associated with  
464 survival specifically among chemotherapy-treated breast cancer patients. *Oncotarget* 2015;6:7390-7407.

465 54 Zhou S, Degan S, Potts EN, Foster WM, Sunday ME: Npas3 is a trachealess homolog critical for  
466 lung development and homeostasis. *P Natl Acad Sci USA* 2009;106:11691-11696.

467 55 Moreira F, Kiehl TR, So K, Ajeawung NF, Honculada C, Gould P, Pieper RO, Kamnasaran D: Npas3  
468 demonstrates features of a tumor suppressive role in driving the progression of astrocytomas. *The*  
469 *American journal of pathology* 2011;179:462-476.

470 56 Onodera Y, Hashimoto S, Hashimoto A, Morishige M, Mazaki Y, Yamada A, Ogawa E, Adachi M,  
471 Sakurai T, Manabe T, Wada H, Matsuura N, Sabe H: Expression of amap1, an arfgap, provides novel  
472 targets to inhibit breast cancer invasive activities. *The EMBO journal* 2005;24:963-973.

473 57 Sabe H, Hashimoto S, Morishige M, Ogawa E, Hashimoto A, Nam JM, Miura K, Yano H, Onodera  
474 Y: The egfr-gep100-arf6-amap1 signaling pathway specific to breast cancer invasion and metastasis.  
475 *Traffic* 2009;10:982-993.

476 58 Matsumoto Y, Sakurai H, Kogashiwa Y, Kimura T, Matsumoto Y, Shionome T, Asano M, Saito K,  
477 Kohno N: Inhibition of epithelial-mesenchymal transition by cetuximab via the egfr-gep100-arf6-amap1  
478 pathway in head and neck cancer. *Head & neck* 2016

479 59 Chevalier C, Collin G, Descamps S, Touaitahuata H, Simon V, Reymond N, Fernandez L, Milhiet  
480 PE, Georget V, Urbach S, Lasorsa L, Orsetti B, Boissiere-Michot F, Lopez-Crapez E, Theillet C, Roche S,  
481 Benistant C: Tom111 drives membrane delivery of mt1-mmp to promote erbb2-induced breast cancer  
482 cell invasion. *Nature communications* 2016;7:10765.

483 60 Emaduddin M, Edelman MJ, Kessler BM, Feller SM: Odin (anks1a) is a src family kinase target in  
484 colorectal cancer cells. *Cell communication and signaling : CCS* 2008;6:7.

485

486

487

488

489

490

491

492

493

494

495

496

497

498

499

500

501

502

503

504

505 **Table 1: Characteristics of Individuals used in Linkage Analyses**

|                   | <b>Affected</b> | <b>Unaffected/Unknown</b> | <b>Total</b> |
|-------------------|-----------------|---------------------------|--------------|
| Genotyped         | 35              | 130                       | 165          |
| Ungenotyped       | 37              | 112                       | 149          |
| Average Age       | 70              | 63.8                      | 66.5         |
| Avg. Age at Onset | 63.7            | N/A                       | N/A          |
| Number Smokers    | 55              | 74                        | 122          |
| Percentage Smoker | 0.76            | 0.31                      | 0.71         |

506 Diagnostic information on the individuals from the 25 extended families used in the linkage analyses  
507 after quality control and removal of married-in spouses. Average age, average age at onset, and  
508 smoking statistics were calculated using individuals with available data.

509

510

511

512

513

514

515

516

517

518

519

520

521

522

523

524

525

526

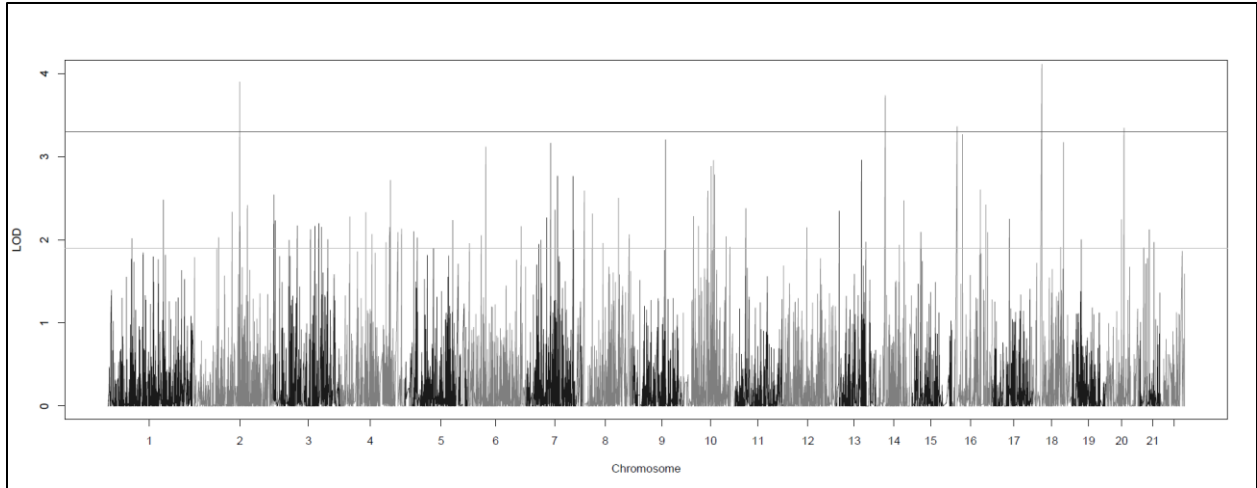

527

528 **Figure 1: Genome-wide HLOD Plot of CHP Variant Two-point Linkage Analysis:** The heterogeneity LOD  
529 (HLOD) scores calculated across all 25 families for the CHP variant two-point linkage analysis performed  
530 by SEQLinkage and MERLIN. The lines at 3.3 and 1.9 represent the thresholds for the respective  
531 significant and suggestive LOD scores as recommended by Lander and Kruglyak.

532

533

534

535

536

537

538

539

540

541

542

543

544

545

546

547 **Table 2: Genome-wide Significant HLOD Scores in CHP Variant Two-point Linkage Analysis**

| CHR      | POS      | GENE              | LOD    | ALPHA | HLOD   |
|----------|----------|-------------------|--------|-------|--------|
| 18p11.23 | 29.36403 | <i>PTPRM</i> [1]  | 4.1099 | 1     | 4.1099 |
| 2p22.2   | 152.1074 | <i>LRP1B</i> [1]  | 3.8964 | 1     | 3.8964 |
| 14q13.1  | 32.13378 | <i>NPAS3</i> [1]  | 3.7337 | 1     | 3.7337 |
| 16p13    | 18.02736 | <i>RBFOX1</i> [1] | 3.3597 | 1     | 3.3597 |
| 20q13.11 | 62.31841 | <i>PTPRT</i> [1]  | 3.3425 | 1     | 3.3425 |

548 The genome-wide significant ( $\geq 3.3$ ) heterogeneity LOD (HLOD) scores from the CHP variant two-point  
549 linkage analysis performed by SEQLinkage and MERLIN. CHR stands for chromosome, POS is the start  
550 position in cM of the regional marker, GENE is the name of the gene within which the positional marker  
551 is located, LOD is the cumulative LOD score across all families, alpha is a measure of the percentage of  
552 families linked to that regional marker and is calculated jointly with HLOD, the heterogeneity LOD score.  
553 The brackets next to the gene name indicate the gene has been broken into pieces and the number in  
554 the bracket represents the particular piece.

555

556

557

558

559

560

561

562

563

564

565

566

567



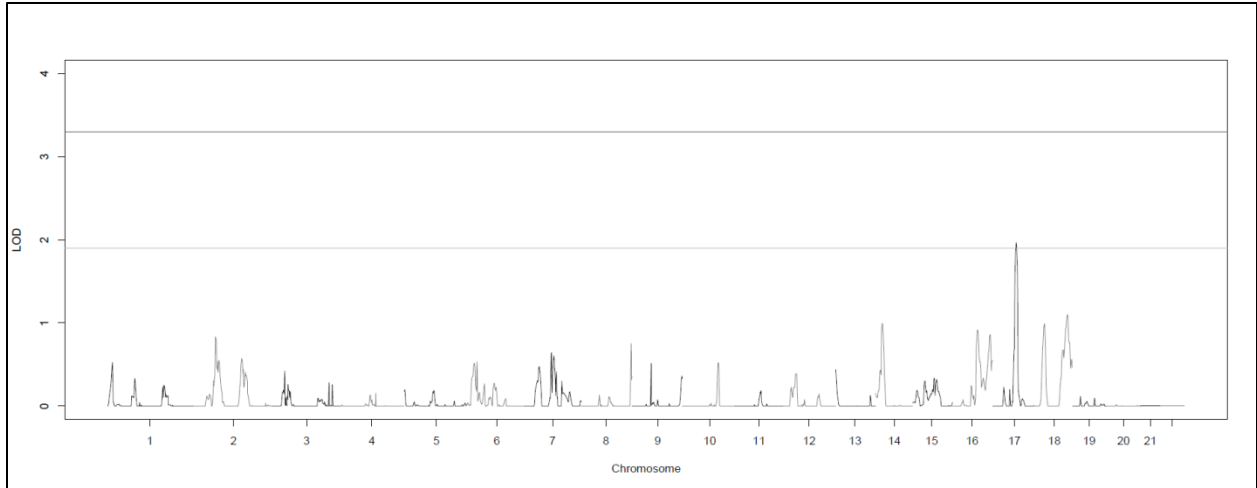

568

569 **Figure 2: Genome-wide HLOD Plot of Multipoint Linkage Analysis:** The heterogeneity LOD (HLOD)  
570 scores calculated across all 25 families for the multipoint linkage analysis performed by SimWalk2. SNP  
571 pruning was necessary before running SimWalk2, which accounts for the less dense map than the two-  
572 point analysis. The lines at 3.3 and 1.9 represent the thresholds for the respective significant and  
573 suggestive LOD scores as recommended by Lander and Kruglyak.

574

575

576

577

578

579

580

581

582

583

584

585

586

587

588 **Table 3: Top Nine HLOD Scores in Multipoint Linkage Analysis**

| CHR      | rsID      | POS     | LOD    | ALPHA | HLOD  | FUNCTION   | GENE                |
|----------|-----------|---------|--------|-------|-------|------------|---------------------|
| 17q21.33 | rs1263965 | 77.8514 | 1.966  | 1     | 1.966 | intronic   | CA10                |
| 17q21.33 | rs6504702 | 77.3418 | 1.957  | 1     | 1.957 | intronic   | UTP18               |
| 17q21.33 | rs7218763 | 78.9483 | 1.921  | 1     | 1.921 | intergenic | CA10,C17orf112      |
| 17q21.33 | rs9890721 | 76.1046 | 1.874  | 1     | 1.874 | exonic     | AMAP1               |
| 17q21.33 | rs1881140 | 75.5546 | 1.853  | 1     | 1.853 | intergenic | LOC101927230,TMEM92 |
| 17q22    | 12165058  | 80.8282 | 1.715  | 1     | 1.715 | intronic   | TOM1L1              |
| 17q22    | rs888207  | 81.3318 | 1.666  | 1     | 1.666 | intergenic | HLF,MMD             |
| 17q21.32 | rs4794031 | 73.5562 | 1.584  | 1     | 1.584 | intergenic | FLJ40194,MIR6129    |
| 17q22    | rs9896667 | 82.8156 | 1.2045 | 0.95  | 1.209 | intergenic | PCTP,ANKFN1         |
| 17q21.33 | 11870935  | 72.4112 | 1.0765 | 0.825 | 1.163 | intronic   | KPNB1               |

589 The top nine HLOD scores from the multipoint analysis performed by SimWalk2. All were located  
590 between 17q21.32-q22. The top three SNPs are genome-wide suggestive ( $\geq$  HLOD 1.9) as  
591 recommended by Lander and Kruglyak. CHR stands for chromosome, rsID is the SNP name, POS is the  
592 start position in cM of the SNP, LOD is the cumulative LOD score across all families, alpha is a measure of  
593 the percentage of families linked to the marker and is calculated jointly with HLOD, the heterogeneity  
594 LOD score, FUNCTION is the location of the SNP, and GENE is the gene or nearby genes. Annotations for  
595 all SNPs were performed by ANNOVAR.

596  
597  
598  
599  
600  
601  
602  
603  
604  
605  
606  
607

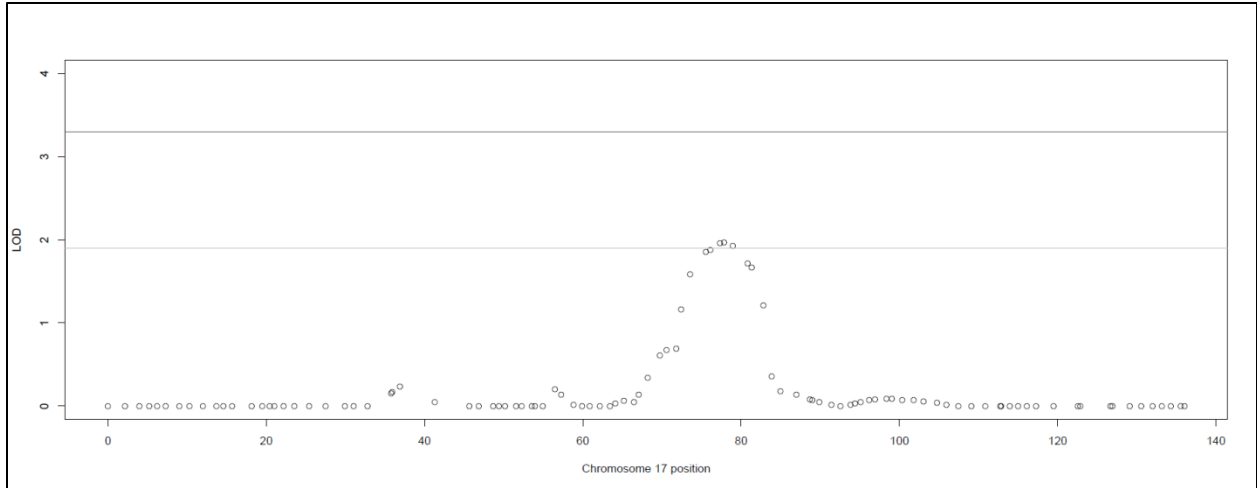

608

609 **Figure 3: Multipoint HLOD Plot of Chromosome 17:** The heterogeneity LOD (HLOD) scores calculated  
610 across all 25 families at chromosome 17 for the multipoint linkage analysis performed by SimWalk2. The  
611 lines at 3.3 and 1.9 represent the thresholds for the respective significant and suggestive LOD scores as  
612 recommended by Lander and Kruglyak.

613

614

615

616

617

618

619

620

621

622

623

624

625

626

627

628 **Supplemental Table 1: Genome-wide Suggestive HLOD Scores in CHP Variant Two-point Linkage**  
629 **Analysis**

| CHR | POS      | GENE         | LOD    | ALPHA | HLOD   |
|-----|----------|--------------|--------|-------|--------|
| 16  | 36.10678 | ABCC1[1]     | 3.2645 | 1     | 3.2645 |
| 9   | 109.3256 | ABCA1[1]     | 3.2015 | 1     | 3.2015 |
| 18  | 102.3015 | CCDC102B[1]  | 3.1704 | 1     | 3.1704 |
| 7   | 82.7502  | WBSCR17[1]   | 3.1612 | 1     | 3.1612 |
| 6   | 60.88568 | DNAH8[1]     | 3.1154 | 1     | 3.1154 |
| 13  | 84.28189 | GPC5[1]      | 2.9583 | 1     | 2.9583 |
| 10  | 102.3388 | NRG3[1]      | 2.9532 | 1     | 2.9532 |
| 10  | 94.27962 | C10orf11[1]  | 2.8822 | 1     | 2.8822 |
| 10  | 105.5822 | GRID1[1]     | 2.7809 | 1     | 2.7809 |
| 7   | 105.5729 | PPP1R9A[1]   | 2.7656 | 1     | 2.7656 |
| 7   | 157.2949 | CNTNAP2[2]   | 2.7621 | 1     | 2.7621 |
| 4   | 166.6779 | MARCH1[1]    | 2.7143 | 1     | 2.7143 |
| 16  | 95.38696 | ADAMTS18[1]  | 2.5993 | 1     | 2.5993 |
| 8   | 7.747743 | CSMD1[1]     | 2.5869 | 1     | 2.5869 |
| 10  | 82.80332 | CTNNA3[1]    | 2.5852 | 1     | 2.5852 |
| 3   | 2.332563 | CNTN6[1]     | 2.5391 | 1     | 2.5391 |
| 8   | 121.7699 | SLC30A8[1]   | 2.4993 | 1     | 2.4993 |
| 1   | 185.1424 | TNR[1]       | 2.4784 | 1     | 2.4784 |
| 14  | 94.3429  | SLC24A4[1]   | 2.4698 | 1     | 2.4698 |
| 16  | 113.593  | CDH13[1]     | 2.4198 | 1     | 2.4198 |
| 2   | 177.0431 | MYO3B[1]     | 2.4139 | 1     | 2.4139 |
| 11  | 35.68421 | NAV2[1]      | 2.3752 | 1     | 2.3752 |
| 7   | 97.2799  | SEMA3A[1]    | 2.3575 | 1     | 2.3575 |
| 13  | 10.40546 | SPATA13[1]   | 2.3454 | 1     | 2.3454 |
| 2   | 126.3212 | DPP10[1]     | 2.3323 | 1     | 2.3323 |
| 4   | 84.84841 | SLC4A4[1]    | 2.3279 | 1     | 2.3279 |
| 8   | 34.61141 | PSD3[1]      | 2.311  | 1     | 2.311  |
| 10  | 35.83745 | FAM107B[1]   | 2.2802 | 1     | 2.2802 |
| 4   | 31.32766 | LDB2[1]      | 2.2748 | 1     | 2.2748 |
| 7   | 69.55921 | ABCA13[1]    | 2.2649 | 1     | 2.2649 |
| 17  | 58.52668 | ASIC2[1]     | 2.2483 | 1     | 2.2483 |
| 20  | 53.84893 | C20orf112[1] | 2.2419 | 1     | 2.2419 |
| 5   | 160.1693 | TNIP1[1]     | 2.2325 | 1     | 2.2325 |
| 3   | 6.61202  | CNTN4[2]     | 2.2296 | 1     | 2.2296 |
| 3   | 152.147  | SLC9A9[1]    | 2.1962 | 1     | 2.1962 |
| 3   | 79.88634 | FHIT[1]      | 2.1678 | 1     | 2.1678 |
| 3   | 138.7392 | CPNE4[1]     | 2.1624 | 1     | 2.1624 |
| 10  | 52.00449 | MPP7[1]      | 2.162  | 1     | 2.162  |
| 2   | 153.422  | KYNU[1]      | 2.1612 | 1     | 2.1612 |

|    |          |              |        |        |        |
|----|----------|--------------|--------|--------|--------|
| 6  | 178.6219 | PACRG[1]     | 2.1584 | 1      | 2.1584 |
| 3  | 160.781  | LINC01214[1] | 2.1508 | 1      | 2.1508 |
| 4  | 163.6827 | FSTL5[1]     | 2.1489 | 1      | 2.1489 |
| 12 | 78.19477 | FAM19A2[1]   | 2.1455 | 1      | 2.1455 |
| 4  | 203.5172 | SORBS2[1]    | 2.1295 | 0.9938 | 2.1297 |
| 3  | 124.0329 | LSAMP[1]     | 2.123  | 1      | 2.123  |
| 21 | 32.30334 | GRIK1[1]     | 2.1207 | 0.9917 | 2.121  |
| 7  | 158.5582 | MIR548F3[1]  | 2.1136 | 1      | 2.1136 |
| 5  | 30.71129 | CTNND2[2]    | 2.0978 | 1      | 2.0978 |
| 15 | 27.82131 | RYR3[1]      | 2.0905 | 1      | 2.0905 |
| 4  | 192.2219 | TENM3[1]     | 2.088  | 1      | 2.088  |
| 16 | 119.3982 | COTL1[1]     | 2.0871 | 1      | 2.0871 |
| 4  | 104.9059 | CCSER1[1]    | 2.0645 | 1      | 2.0645 |
| 8  | 156.986  | FAM135B[1]   | 2.0615 | 1      | 2.0615 |
| 6  | 45.88286 | CASC15[1]    | 2.05   | 1      | 2.05   |
| 8  | 7.747743 | CSMD1[2]     | 2.0458 | 1      | 2.0458 |
| 10 | 143.7745 | MIR5694[1]   | 2.0371 | 1      | 2.0371 |
| 2  | 81.27133 | LINC01122[1] | 2.025  | 1      | 2.025  |
| 5  | 41.81669 | CDH18[1]     | 2.0225 | 1      | 2.0225 |
| 1  | 80.14709 | SLC1A7[1]    | 2.0135 | 1      | 2.0135 |
| 3  | 181.8731 | NAALADL2[1]  | 2.003  | 1      | 2.003  |
| 19 | 31.13983 | DNM2[1]      | 2.0009 | 1      | 2.0009 |
| 7  | 50.29992 | PDE1C[1]     | 1.9958 | 1      | 1.9958 |
| 3  | 52.79558 | RBMS3[1]     | 1.9946 | 1      | 1.9946 |
| 13 | 98.90918 | NALCN[1]     | 1.9716 | 1      | 1.9716 |
| 21 | 47.89004 | ERG[1]       | 1.9682 | 1      | 1.9682 |
| 4  | 151.989  | LRBA[1]      | 1.9664 | 1      | 1.9664 |
| 8  | 69.97262 | XKR4         | 1.9567 | 1      | 1.9567 |
| 6  | 5.959985 | GMDS[1]      | 1.9556 | 1      | 1.9556 |
| 7  | 42.64313 | JAZF1[1]     | 1.9462 | 1      | 1.9462 |
| 14 | 79.11249 | CEP128[1]    | 1.9351 | 1      | 1.9351 |
| 10 | 156.932  | DOCK1[1]     | 1.9109 | 1      | 1.9109 |
| 18 | 92.15627 | PHLPP1[1]    | 1.9092 | 1      | 1.9092 |
| 7  | 158.7946 | MIR548T[1]   | 1.9024 | 1      | 1.9024 |
| 21 | 13.0434  | CHODL[1]     | 1.9017 | 1      | 1.9017 |

630 The genome-wide suggestive ( $\geq 1.9$ ) heterogeneity LOD (HLOD) scores from the CHP variant two-point  
631 linkage analysis performed by SEQLinkage and MERLIN. CHR stands for chromosome, POS is the start  
632 position in cM of the regional marker, GENE is the name of the gene within which the positional marker  
633 is located, LOD is the cumulative LOD score across all families, alpha is a measure of the percentage of  
634 families linked to that regional marker and is calculated jointly with HLOD, the heterogeneity LOD score.  
635 The brackets next to the gene name indicate the gene has been broken into pieces and the number in  
636 the bracket represents the particular piece.

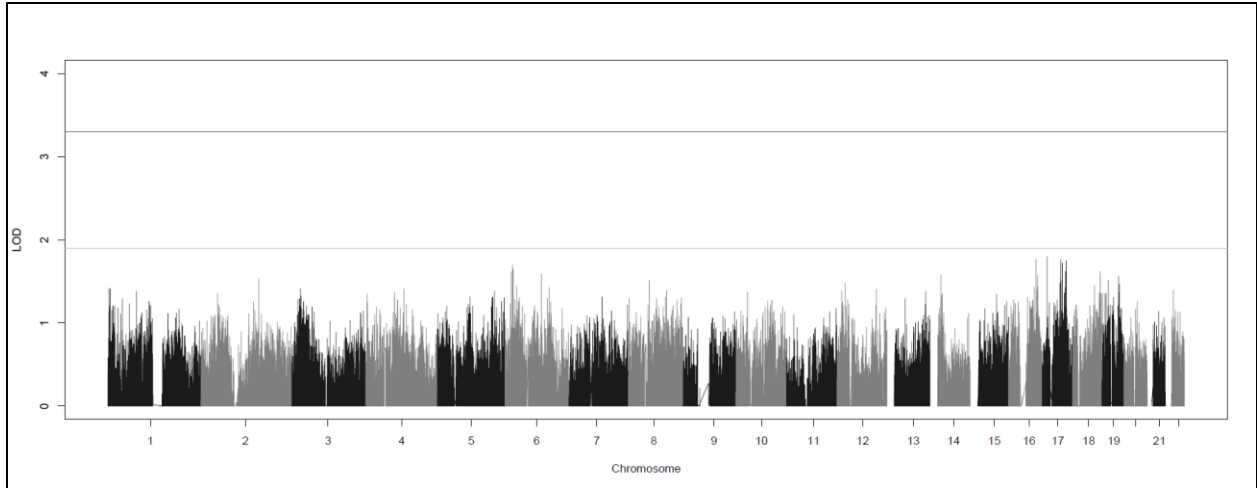

637

638 **Supplemental Figure 1: Genome-wide HLOD Plot of Single Variant Two-point Linkage Analysis:** The  
639 heterogeneity LOD (HLOD) scores calculated across all 25 families for the multipoint linkage analysis  
640 performed by TwoPointLods. The lines at 3.3 and 1.9 represent the thresholds for the respective  
641 significant and suggestive LOD scores as recommended by Lander and Kruglyak.

642

643

644

645

646

647

648

649

650

651

652

653

654

655

656

657 **Supplemental Table 2: Highest LOD Score for each Families**

| <b>FID</b> | <b>SV TP LOD</b> | <b>MP LOD</b> | <b>CHP TP LOD</b> |
|------------|------------------|---------------|-------------------|
| 137        | 0.2886           | 0.356         | 0.3362            |
| 138        | 0.8152           | 0.817         | 0.8176            |
| 139        | 0.171            | 0.208         | 0.2004            |
| 140        | 0.4849           | 0.542         | 0.8027            |
| 141        | 0.2635           | 0.281         | 0.2741            |
| 143        | 0.4779           | 0.505         | 0.4188            |
| 144        | 0                | 0             | 0                 |
| 145        | 0.5962           | 0.774         | 0.7452            |
| 147        | 0.5502           | 0.55          | 0.5503            |
| 148        | 0.6733           | 0.807         | 0.7642            |
| 149        | 0.4692           | 0.545         | 0.5446            |
| 150        | 0.1497           | 0.197         | 0.264             |
| 151        | 0.2305           | 0.231         | 0.2306            |
| 153        | 0                | 0             | 0                 |
| 154        | 0                | 0             | 0                 |
| 155        | 0                | 0.057         | 0.5446            |
| 156        | 0                | 0             | 0                 |
| 157        | 0                | 0.034         | 0.2277            |
| 159        | 0                | 0.03          | 0.2699            |
| 160        | 0.263            | 0.276         | 0.2766            |
| 161        | 0.2156           | 0.231         | 0.2236            |
| 162        | 0.2473           | 0.262         | 0.2476            |
| 163        | 0                | 0             | 0                 |
| 164        | 0.4977           | 0.552         | 0.5086            |
| 165        | 0.265            | 0.27          | 0.2614            |

658 The overall highest LOD score for each of the 25 families. The three scores correspond to the three  
659 types of linkage analyses: single variant two-point (SV TP LOD), multipoint (MP LOD), and collapsed  
660 haplotype pattern variant two-point (CHP TP LOD). FID represents the family ID.
